# Supplementary material for: Lattice strain and texture analysis of superhard Mo0.9W1.1BC and ReWC0.8via diamond anvil cell deformation
Source: Royal Society of Chemistry journal article supplement (doi:10.1039/c9ta06431a), 2019-01-01
Supplement: c9ta06431a1.pdf [file c9ta06431a1.pdf]

## Supporting Information

### **Lattice strain and texture analysis of superhard $\text{Mo}_{0.9}\text{W}_{1.1}\text{BC}$ and $\text{ReWC}_{0.8}$ via diamond anvil cell deformation**

Marcus Parry,<sup>a</sup> Samantha Couper,<sup>b</sup> Aria Mansouri Tehrani,<sup>c</sup> Anton O. Oliynyk,<sup>c</sup> Jakoah Brgoch,<sup>c</sup> Lowell Miyagi,<sup>b</sup> and Taylor D. Sparks<sup>a</sup>

<sup>a</sup> *Department of Materials Science and Engineering, University of Utah, Salt Lake City, Utah 84112, United States*

<sup>b</sup> *Department of Geology and Geophysics, University of Utah, Salt Lake City, Utah 84112, United States*

<sup>c</sup> *Department of Chemistry, University of Houston, Houston, Texas 77204, United States*

**Table S1.** Refined lattice parameters for  $\text{Mo}_{0.9}\text{W}_{1.1}\text{BC}$  and the associated Pt pressure calibrant along with calculated pressure values.

| $P$ (GPa) | $\text{W}_{1.1}\text{Mo}_{0.9}\text{BC}$ |            |            | Pt        |                 |
|-----------|------------------------------------------|------------|------------|-----------|-----------------|
|           | $a$ (Å)                                  | $b$ (Å)    | $c$ (Å)    | $a$ (Å)   | $R_{\text{wp}}$ |
| 0.33(4)   | 3.07472(7)                               | 17.2955(5) | 3.04001(7) | 3.9216(2) | 6.92            |
| 7.04(7)   | 3.0541(2)                                | 17.183(1)  | 3.0225(2)  | 3.8919(3) | 8.96            |
| 17.23(7)  | 3.0315(1)                                | 17.0429(9) | 2.9992(1)  | 3.8527(2) | 6.47            |
| 26.43(8)  | 3.0063(1)                                | 16.9139(8) | 2.9749(1)  | 3.8218(2) | 6.09            |
| 35.7(1)   | 2.9871(1)                                | 16.794(1)  | 2.9551(1)  | 3.7940(3) | 6.35            |
| 47.74(9)  | 2.9625(1)                                | 16.6722(9) | 2.9319(1)  | 3.7617(2) | 6.74            |

**Table S2.** Refined lattice parameters for  $\text{ReWC}_{0.8}$  and the associated corundum pressure calibrant along with calculated pressure values.

| $P$ (GPa) | $\text{ReWC}_{0.8}$ |           | Corundum  |                 |
|-----------|---------------------|-----------|-----------|-----------------|
|           | $a$ (Å)             | $a$ (Å)   | $c$ (Å)   | $R_{\text{wp}}$ |
| 4.06(4)   | 4.0777(2)           | 4.7391(2) | 12.934(1) | 6.00            |
| 10.62(6)  | 4.0578(2)           | 4.7055(2) | 12.829(1) | 6.11            |
| 20.28(8)  | 4.0271(2)           | 4.6616(3) | 12.695(1) | 7.02            |
| 35.29(9)  | 3.9885(2)           | 4.6021(3) | 12.529(1) | 5.72            |
| 47.4(1)   | 3.9572(2)           | 4.5619(3) | 12.410(1) | 6.64            |
| 61.0(1)   | 3.9300(3)           | 4.5212(3) | 12.296(1) | 5.23            |

**Table S3.** Refined lattice strain parameter,  $Q(hkl)$ , for lattice planes of interest in  $\text{Mo}_{0.9}\text{W}_{1.1}\text{BC}$ .

| $P$ (GPa) | $Q(110)$  | $Q(130)$   | $Q(041)$   | $Q(200)$   | $Q(002)$   | $Q(191)$   |
|-----------|-----------|------------|------------|------------|------------|------------|
| 0.33(4)   | 0         | 0          | 0          | 0          | 0          | 0          |
| 7.04(7)   | 0.0016(5) | 0.0016(1)  | 0.00118(5) | 0.0011(2)  | 0.0031(2)  | 0.0019(7)  |
| 17.23(7)  | 0.0009(2) | 0.00117(6) | 0.00102(2) | 0.0019(1)  | 0.00132(8) | 0.00086(4) |
| 26.43(8)  | 0.0027(2) | 0.00359(7) | 0.00333(2) | 0.00518(8) | 0.0042(1)  | 0.00278(3) |
| 35.7(1)   | 0.0033(2) | 0.00471(3) | 0.00386(3) | 0.0060(1)  | 0.0049(1)  | 0.00343(4) |
| 47.74(9)  | 0.0043(2) | 0.00558(7) | 0.00509(3) | 0.0074(1)  | 0.0076(1)  | 0.00427(4) |

**Table S4.** Refined lattice strain parameter,  $Q(hkl)$ , for lattice planes of interest in  $\text{ReWC}_{0.8}$ .

| $P$ (GPa) | $Q(111)$   | $Q(200)$   | $Q(220)$   | $Q(311)$   |
|-----------|------------|------------|------------|------------|
| 4.06(4)   | 0.0275(6)  | 0.00022(9) | 0.00370(7) | 0.00436(8) |
| 10.62(6)  | 0.00665(5) | 0.00447(9) | 0.00525(8) | 0.00861(7) |
| 20.28(8)  | 0.00703(5) | 0.0060(1)  | 0.00706(8) | 0.0106(1)  |
| 35.29(9)  | 0.0078(2)  | 0.0076(1)  | 0.00769(9) | 0.01111(8) |
| 47.4(1)   | 0.0101(2)  | 0.0070(1)  | 0.0087(1)  | 0.0114(1)  |
| 61.0(1)   | 0.0121(2)  | 0.0062(3)  | 0.0092(1)  | 0.0135(2)  |
